# Supplementary material
Source: Research Square preprint supplement (doi:10.21203/rs.3.rs-9592031/v1)
Supplement: Supplementary file 1 [file 557eec61e830ba5d051a509d.docx]

Table 1 PCR primers used in this study

a, R in primer sequences indicates nucleotide bases A + G

b, This primer pair was originally designed for the detection of *P. carotovorum* causing potato blackleg in Japan, which was reclassified as *P. wasabiae*. Because PCR using the primer pair gives specific PCR amplicon not only *P. parmentieri*, but a few other *Pectobacterium* spp. (Nakayama T., unpublished data), the target bacterium is described as “*P. wasabiae*”.

Table 2 Detection and isolation of *Pectobacterium brasiliense* and *Dickeya dianthicola* from plants

*P. parmentieri*, *P. atrosepticum* and other *Dickeya* spp. were not detected from tested plants.

a, number of positive (number of isolates)

Table 3 Infection of 11 species of plants in root or rhizome with the five blackleg pathogens

Pb, *Pectobacterium brasiliense*; Pp, *P parmentieri*; Pa, *P. atrosepticum*; Ddi, *Dickeya dianthicola*; Dch, *D. chrysanthemi*; control, sterilized distilled water (disease-free control)

Table 4 Field inoculation test of Pb isolates on seed potato (cv. Touya)

a, culture collection of the Research Center of Genetic Resources, NARO (control)

b, sterilized distilled water (disease-free control)
