# Supplementary material
Source: Research Square preprint supplement (doi:10.21203/rs.3.rs-9592031/v1)

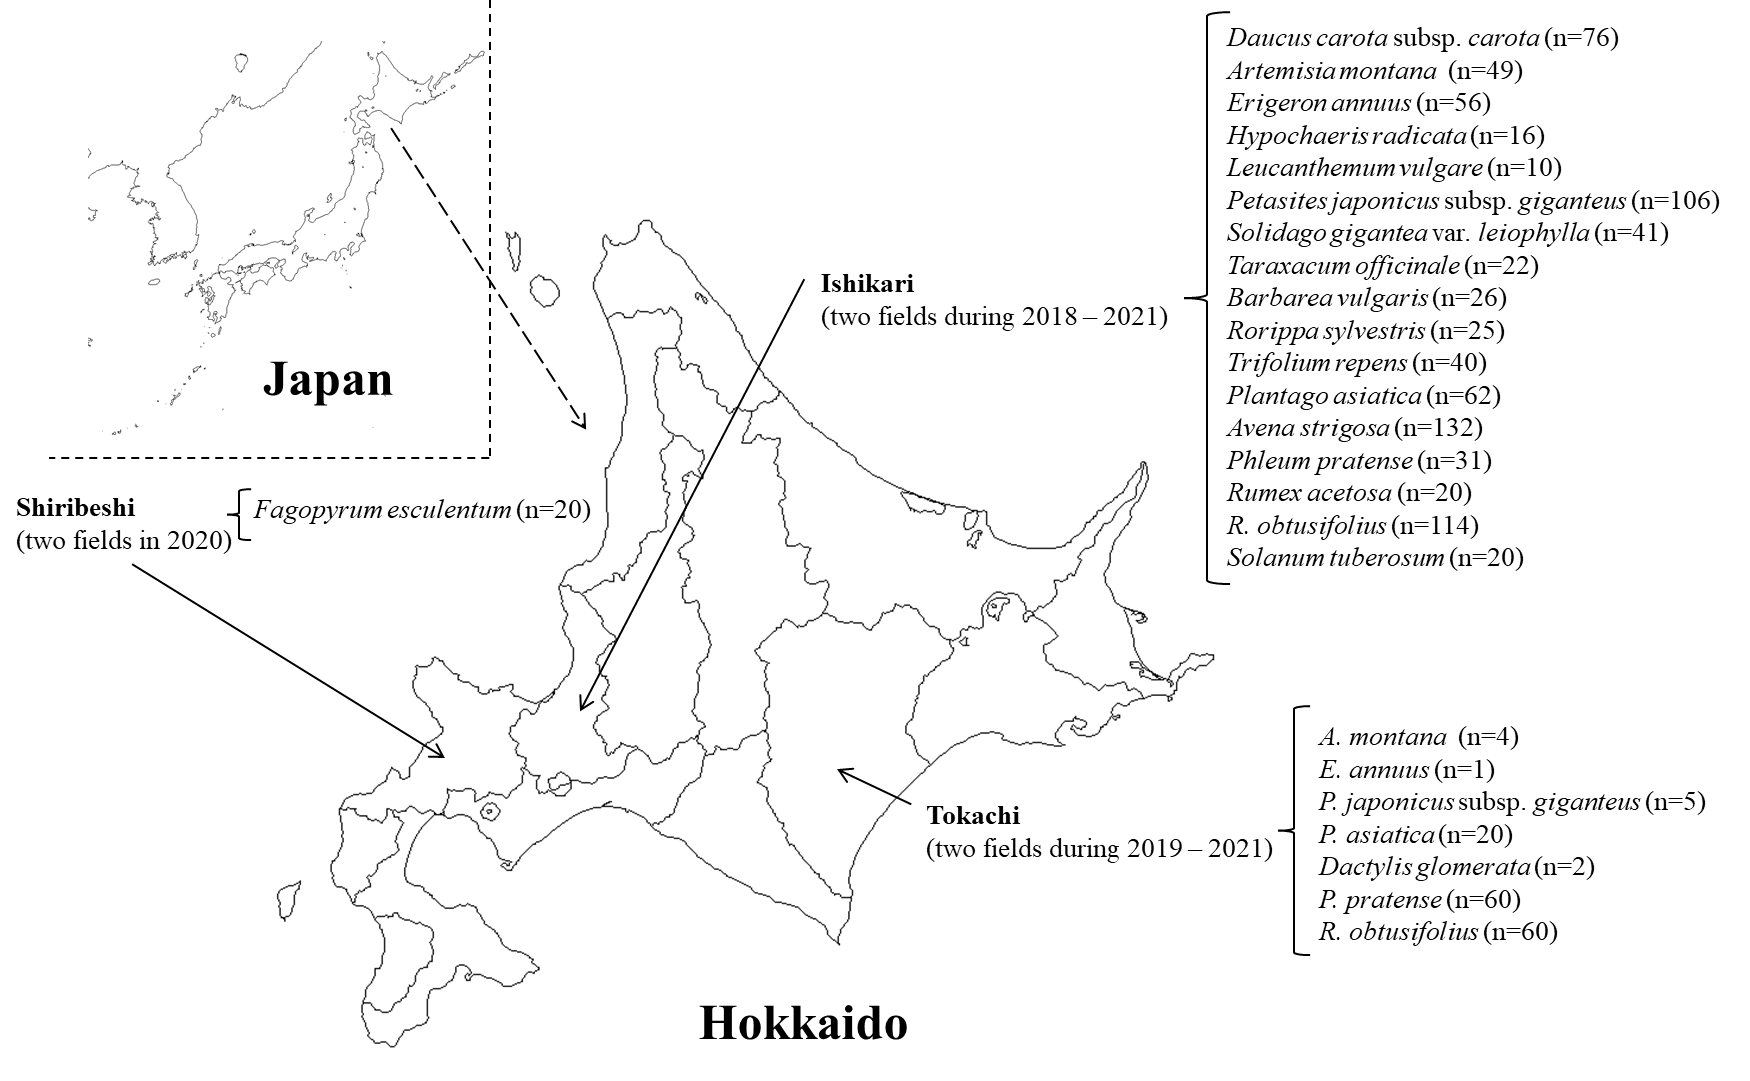


**Fig. S1** Collection sites of tested plant

n, number of plants tested.

Supplement: Supplementary file 2 [file 6b340464038b845dce1684ac.docx]
